# Supplementary material
Source: Springer Nature journal article supplement (https://www.springermedizin.de/resource/supplementary/12906_2010_363_MOESM2_ESM.pdf/9519718)

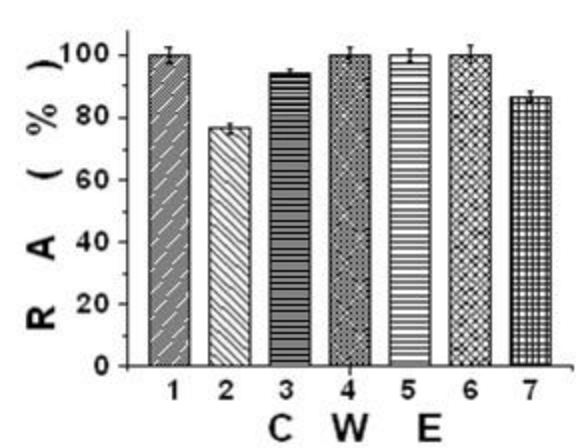

(a)

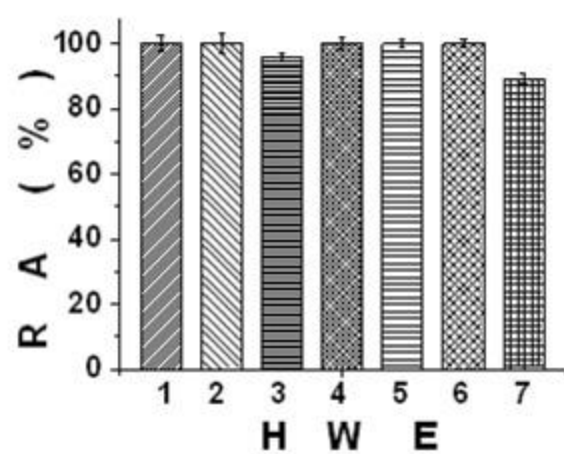

(b)

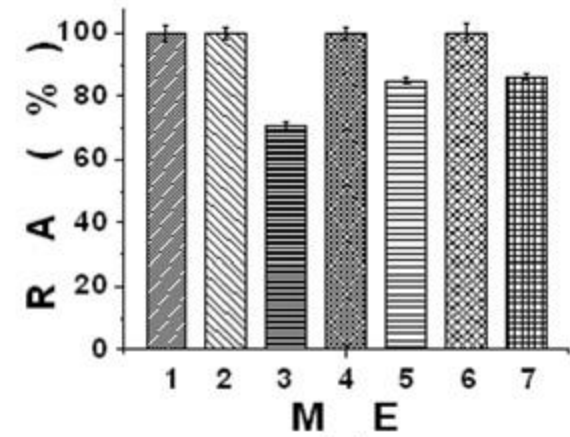

(c)

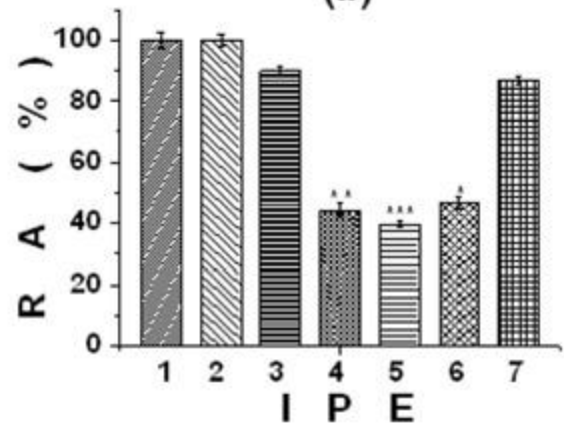

(d)

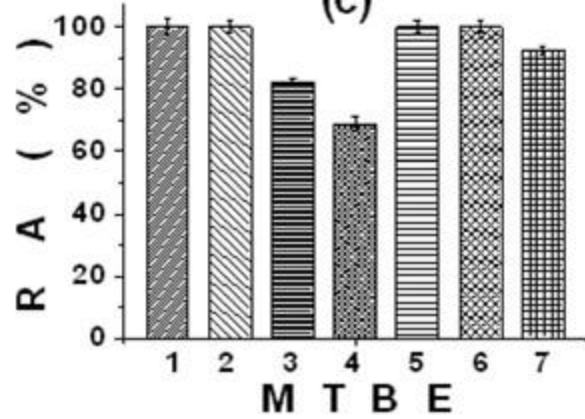

(e)

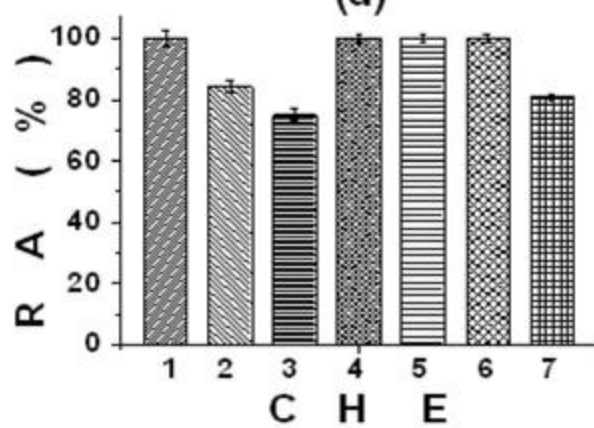

(f)

Supplement: MOESM2 [file 9519718]
